# Supplementary material
Source: PubMed Central journal article supplement (PMC4922535)
Supplement: NIHMS797019-supplement-SI.pdf [file NIHMS797019-supplement-SI.pdf]

# Supporting Information

## Ultrasensitive Rapid Detection of Human Serum Antibody Biomarkers by Biomarker-Capturing Viral Nanofibers

Yicun Wang,<sup>†‡</sup> Zhigang Ju,<sup>†‡‡</sup> Binrui Cao,<sup>‡</sup> Xiang Gao,<sup>†</sup> Ye Zhu,<sup>‡</sup> Penghe Qiu,<sup>‡</sup> Hong Xu,<sup>‡</sup>  
Pengtao Pan,<sup>†</sup> Huizheng Bao,<sup>§</sup> Li Wang,<sup>\*†</sup> and Chuanbin Mao<sup>\*\*‡</sup>

<sup>†</sup>Institute of Genetics and Cytology, School of Life Sciences, Northeast Normal University, 5268  
Renmin Street, Changchun, Jilin Province, 130024, P.R. China

<sup>‡</sup>Department of Chemistry & Biochemistry, Stephenson Life Sciences Research Center,  
University of Oklahoma, 101 Stephenson Parkway, Norman, OK 73019-5300, USA

<sup>§</sup>Jilin Provincial Tumor Hospital, Changchun, Jilin Province, 130021, P.R. China

<sup>‡</sup>Yicun Wang and Zhigang Ju equally contributed to this work.

### Corresponding Author

\*\*Email: [cbmao@ou.edu](mailto:cbmao@ou.edu)

\*Email: [wangli@nenu.edu.cn](mailto:wangli@nenu.edu.cn)

## **Production of Polyclonal Anti-Sap2-IgG in Rabbits to Be Used for Determining Detection Limit**

**1. Rabbit Immunization and Serum-Collection.** Serum was collected from Sap2-immunized rabbits by following a standard protocol.<sup>1,2</sup> Two adult female New Zealand white rabbits were used for the production of polyclonal anti-Sap2-IgG. Briefly, on day 1, both rabbits were immunized with 1 mg of purified Sap2 protein emulsified with complete Freund's adjuvant (Sigma, St. Louis, MO) through subcutaneous injections at 10 different sites. On day 21, the rabbits were booster-immunized with Sap2 protein (500 µg each rabbit) mixed with incomplete Freund's adjuvant. 10 days after the booster-immunization (on day 31), the blood from each animal was harvested and the serum was stored at -80°C. The blood samples collected before immunization and on day 21 (after booster immunization) were also collected as negative controls.

**2. Purification and Characterization of Anti-Sap2-IgG.** Anti-Sap2-IgG was purified with Protein G (GE Healthcare Life Science) by following the manufacturer's protocol. The purified anti-Sap2-IgG was used at a concentration of 6.41 mg/ml. Then the specificity of the anti-Sap2-IgG was tested by ELISA and Western-blotting assay: **(1) ELISA.** The purified anti-Sap2-IgG solution was diluted serially (1:12800, 1:25600, 1:51200, 1:102400, 1:204800, 1:409600, 1:819200 and 1:1638400) and tested by ELISA. Specifically, 96-well immunoplates were coated with 100 µl of purified Sap 2 protein (3 mg/l) in 50 mmol/l carbonate buffer (pH9.6) overnight at 4°C and blocked with 200 µl PBS with Tween® 20 (PBST) containing 1% bovine serum albumin (BSA) for 2 h at 37°C. Then anti-Sap2-IgG solution with various dilutions was added into the wells of the plate, respectively, and allowed for incubation for 1 h at 37°C. After

incubation, each well of the plate was washed and incubated with 100  $\mu$ l HRP-conjugated goat-anti-rabbit IgG (dilution with a ratio of 1:5000 in PBST) for 1 h at 37°C. Finally, each well of the plates was washed with PBST and incubated with 100  $\mu$ l TMB solution for 20 min at 37°C. The absorbance of the yellow HRP-converted substrate was measured at 450 nm using a microplate reader (Figure S2). The results indicated that the titer of anti-Sap2-IgG was 1: 409600. **(2) Western Blot assay.** The Sap2 protein was run on a 10% SDS-PAGE gel, which was then transferred to nitrocellulose membranes (Bio-Rad) and blocked with 5% non-fat milk in TBST overnight at 4°C. The next day, the membrane was incubated with purified anti-Sap2 solution (6.38 mg/ml) for 1 h at 37°C, washed with PBST, exposed to HRP-conjugated goat-anti-rabbit IgG for 45 min at room temperature, and finally stained with 2-amino-9-ethylcarbazole (Amresco, USA) as a chromogen. The non-immunized serum was used as negative control. The results confirmed the specificity of our purified anti-Sap2-IgG (Figure S3).

### **Determination of the Limit of Detecting anti-Sap2-IgG by Using Sap2 Protein and Our ASIT-MNP-phage as Biomarker-Capturing Probes in ELISA**

**1. Sap2 Protein-based ELISA Method.** A 96-well plate was coated with 100  $\mu$ l Sap2 protein (3 $\mu$ g/ml) in carbonate buffer (pH 9.6) overnight at 4°C. Next day, each well of the plate was washed 3 times with PBST and blocked with 200  $\mu$ l PBST containing 1% BSA for 2 h at 37°C, followed by incubation with 100  $\mu$ l of anti-Sap2-IgG with serial dilutions (ranging from 0.03125 ng/ml to 500 ng/ml). After incubation for 1 h at 37°C, the plate was washed and incubated with 100  $\mu$ l HRP-conjugated goat-anti-rabbit IgG (dilution 1:5000 in PBST) for 1 h at 37°C. Finally, each well of the plate was washed with PBST and incubated with 100  $\mu$ l TMB solution for 20

min at 37°C. The absorbance at 450 nm of each well was measured using a microplate reader and plotted against the concentration of the corresponding diluted anti-Sap2-IgG solution (Figure 3b). A good linear relationship between ODs and concentrations of anti-IgG was established in the concentration range of 0.5 ng/ml-70 ng/ml ( $y=0.0101x+0.1459$ ,  $R^2=0.9957$ ). The analysis of the data shown in Figure 3b using a standard analytical chemical method<sup>3,4</sup> showed that the limit of detection is approximately 89.56 pg/ml.

**2. ASIT-MNP-phage-based ELISA Method.** 10 ml of each of the diluted anti-Sap2-IgG solution ranging from 1.25 pg/ml to 2.5 ng/ml was incubated with the ASIT-MNP-phage complexes for 1 h. Then the ASIT-MNP-phage complexes were collected and enriched by a magnet and the captured anti-Sap2-IgG was eluted off from ASIT-MNP-phage using 100 µl of an elution buffer. The eluted anti-Sap2-IgG was tested by ELISA with the same protocol described in the last section. The results (Figure 3c) indicate that a good relationship between ODs and concentrations of IgG could be established in the concentration range of 5 pg/ml-200 pg/ml ( $y=0.0012x + 0.1156$ ,  $R^2=0.9997$ ). The analysis of the data shown in Figure 3c using a standard analytical chemical method<sup>3,4</sup> showed that the limit of detection is approximately 1.118 pg/ml.

**Table S1.** After the last round of selection, the eluted phage colonies were randomly picked up for sequencing and occurrence number for each colony was counted.

|                               |                 |                  |   |                  |   |
|-------------------------------|-----------------|------------------|---|------------------|---|
| LRTSPSKQRDHLTSP <sup>a)</sup> | 4 <sup>b)</sup> | FQDQHLLSPLPTLDA  | 1 | NRCGPLKSQFRMPGS  | 1 |
| IRQTRSRLSRWAS                 | 4               | LLRQFSFQHPRPLLR  | 1 | TISLVTWPREPQLQT  | 1 |
| PTYSLVPRLATQPFK               | 3               | CRPYRRSLRS RLLPW | 1 | QPITGCYLQTAFFPH  | 1 |
| PSATERLPAQSHPEG               | 2               | AAIAPNMLTSMRDQL  | 1 | LLIPPHQSPLLADQI  | 1 |
| TVSDEVLLRLPSTA                | 2               | RYTLLLTSTLPQRR   | 1 | QFYRPMNLSLHFMPA  | 1 |
| LALSPQSWPGPANS                | 2               | PPVINVGSTLPSQDA  | 1 | PYSPPPPQVRALQH   | 1 |
| PFISYGAQTPLLVPF               | 2               | HPTLFLPPHLPVPSL  | 1 | SFQPDQLFHLLRAAY  | 1 |
| TWVASALKNLLYACP               | 2               | LPRIPIMSQLVVLQWF | 1 | HSLLPNAKHPSAPPV  | 1 |
| QLPSSTPLYATTWQP               | 2               | PADNTNTRKSTPHQM  | 1 | VKTSPPLTHLLEH    | 1 |
| TPSSSLVVLQSKAT                | 2               | QMPDNWSSNSYSQPP  | 1 | WDLVLRWKQCESHI   | 1 |
| NNPSEPRVLLSLYQS               | 1               | IVIQTNKSHLPAAKA  | 1 | DQSQAPFKPEKAYSM  | 1 |
| QPSIRSHPSLMAEIL               | 1               | PPAPSYARSSRTSSH  | 1 | APPHQAQRSSVPVVA  | 1 |
| APSCFEGPQLVTPPR               | 1               | TLQWVPAVPPQSVWA  | 1 | LTQQLRLPSPGHGAL  | 1 |
| DWRHSRLDLWPRNMV               | 1               | ATSREFSQMTNSSL   | 1 | EQHVMVVHVSRLPALD | 1 |
| PWSPLDLPWLSRLH                | 1               | LSLPQSGLPRSALRG  | 1 | QQAPVYMFEPWSWCT  | 1 |
| TVDLRSRASKYSSTLD              | 1               | PYKPQLSHSTHMRQS  | 1 | -----            | - |

<sup>a)</sup> amino acid sequence of each peptide displayed on phage clones screened by phage library;

<sup>b)</sup> occurrence frequency of each peptide

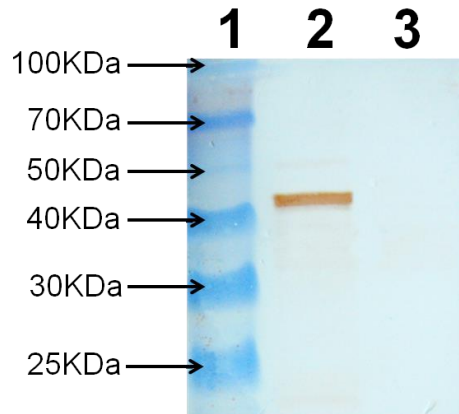

**Figure S1.** Western blot for PK-ASIT phage and wild-type (WT) phage with candidiasis serum. Left lane, maker; middle lane, PK-ASIT phage; and right lane 3, WT phage. The following experimental procedures were carried out to obtain the data. First, PK-ASIT phage and wild-type phage were run on a SDS-PAGE gel and then transferred onto one nitrocellulose membrane at the same time. Second, the membrane was incubated first with serum collected from candidiasis patients and subsequently with HRP-conjugated goat-anti-human IgG. Third, the membrane was stained with 2-amino-9-ethylcarbozole.

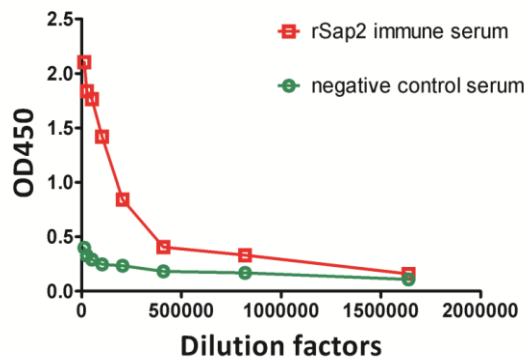

**Figure S2.** ELISA result of the purified anti-Sap2-IgG solutions with a series of dilutions.

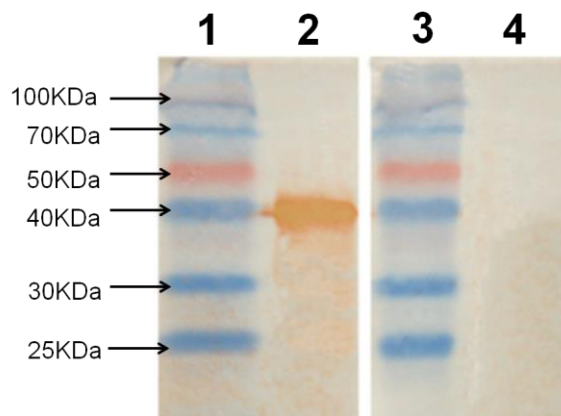

**Figure S3.** Western blotting analysis of anti-Sap2-IgG. Left image: Lane 1, marker; Lane 2, anti-Sap2-IgG. Right image: Lane 3, marker; Lane 4, non-immunized serum.

References:

1. Yang, Y.; Wang, B.; Yang, D.; Lu, M.; Xu, Y. Prokaryotic Expression of Woodchuck Cytotoxic T Lymphocyte Antigen 4 (wCTLA-4) and Preparation of Polyclonal Antibody to wCTLA-4. *Protein Expr. Purif.* 2012, 81, 181-185.
2. Ruan, G. P.; Ma, L.; He, X. W.; Meng, M. J.; Zhu, Y.; Zhou, M. Q.; Hu, Z. M.; Wang, X. N. Efficient Production, Purification, and Application of Egg Yolk Antibodies Against Human HLA-A\*0201 Heavy Chain and Light Chain (beta2m). *Protein Expr. Purif.* 2005, 44, 45-51.
3. Armbruster, D. A.; Pry, T. Limit of Blank, Limit of Detection and Limit of Quantitation. *Clin. Biochem. Rev.* 2008, 29 Suppl 1, S49-S52.
4. Shrivastava, A.; Gupta, V. Methods for the Determination of Limit of Detection and Limit of Quantitation of the Analytical Methods. *Chron. Young Scientists* 2011, 2, 21-25.
